# Supplementary material for: Traditional Asian Herbs in Skin Whitening: The Current Development and Limitations
Source: Front Pharmacol. 2020 Jul 7;11:982. doi: 10.3389/fphar.2020.00982 (PMC7358643; doi:10.3389/fphar.2020.00982)
Supplement: Supplementary file 3 [file DataSheet_3.xlsx]

## Sheet: Information
No.	Reagents	Types	Purity	Scientific name	Source	Extraction medium	Component determination	Processing	Mechanisms	in vitro/vivo	Models	Country	Year	Authors	Note	Title
1	Mannosylerythritol lipids	crude extract	Unknown	Unknown,yeast and fungi	Unknown	Unknown	Unknown	Unknown	ERK/CREB/MiTF signaling pathway	in vitro	B16 cells,3D human skin model	Korea	2019	Bae I-H, Lee ES, Yoo JW, Lee SH, Ko JY, Kim YJ, et al.	\	Mannosylerythritol lipids inhibit melanogenesis via suppressing ERK-CREB-MiTF-tyrosinase signalling in normal human melanocytes and a three-dimensional human skin equivalent
2	herbal extract	crude extract	Unknown	Rhinacanthus nasutus (L.) Kurz，Ardisia elliptica Thunb.，Phyllanthus acidus (L.) Skeels.	HRH Princess Sirindhorn Herb Garden, Rayong province, Thailand	ethanol	Unknown	The plants were ex_x0002_tracted by using the Soxhlet apparatus. In brief, 10 g of dried plant was extracted separately with petroleum ether, dichloromethane and ethanol. Solvents were re_x0002_moved using a vacuum rotary evaporator under reduced pressure using the MiVac Quattro concentrator. Con_x0002_centrated samples were dissolved in DMSO at 100 mg/ml and stored at -20 °C until used. Yields o…	tyrosinase activity	in vitro	mushroom tyrosinase	Thailand	2017	Chatatikun M, Chiabchalard A	\	Thai plants with high antioxidant levels, free radical scavenging activity, anti-tyrosinase and anti-collagenase activity
3	herbal extract	crude extract	Unknown	Croton roxburghii，Croton sublyratus	HRH Princess Sirindhorn Herb Garden, Rayong province, Thailand	ethanol	Unknown	Fresh leaves were washed and dried in a hot air oven at 45 C. Dried leaves were blended into a fine powder. Dried powder of the leaves (10 g) was extracted in the organic solvents (1:40, w/v) petroleum ether, dichloromethane and absolute ethanol, sequentially. The extracts from petroleum ether and dichloromethane fractions were discarded. The ethanol fractions were concentrated using a MiVac Quat…	tyrosinase activity， MITF	in vitro	B16F10 cells	Thailand	2018	Chatatikun M, Yamauchi T, Yamasaki K, Aiba S, Chiabchalard A	\	Anti melanogenic effect of Croton roxburghii and Croton sublyratus leaves in alpha-MSH stimulated B16F10 cells
4	Feruloylserotonin	ingredient	Unknown	Carthamus tinctorius L.	synthesized	synthesized	Unknown	FS was synthesized by the reaction of activated esters of hydroxycinnamic acids with serotonin hydrochloride under alkaline conditions	ERK，cAMP/CREB/MITF，antioxidant	in vitro	B16F10，SK-Mel-2 cells	Korea	2017	Cho H, Kim O, Lee Y, Kang L-J, Nguyen CN, Ishihara A, et al.	\	Feruloylserotonin inhibits hydrogen peroxide-induced melanogenesis and apoptosis in B16F10 and SK-Mel-2 melanoma cells
5	Ficin	ingredient	Unknown	Ficus sycomorus L.	Unknown	Unknown	Unknown	Unknown	MAPKs，antioxidant	in vitro	B16F10 cells	Korea	2019	Cho UM, Choi DH, Yoo DS, Park SJ, Hwang HS	\	Inhibitory Effect of Ficin Derived from Fig Latex on Inflammation and Melanin Production in Skin Cells
6	herbal extract	crude extract	Unknown	Persicaria tinctoria (Aiton) H.Gross.	JejuIndi, Inc. (Jeju, Korea)	ethanol	HPLC	Dried flowers (10 g) were mixed with 600 mL of a 70% ethanol solution and incubated at room temperature for 24 h. The extract was filtered through filter paper and the solvent was evaporated. After freeze-drying, the extract was powdered and used in experiments. The yield of the extract was 19.8% (1.98 g).	tyrosinase activity，MAPKs，AKT/MITF	in vitro	B16F10 cells	Korea	2018	Chung YC, Ko J-H, Kang H-K, Kim S, Kang CI, Lee JN, et al.	\	Antimelanogenic Effects of Polygonum tinctorium Flower Extract from Traditional Jeju Fermentation via Upregulation of Extracellular Signal-Regulated Kinase and Protein Kinase B Activation
7	total flavonoid	ingredient	Unknown	Panax notoginseng (Burkill) F.H.Chen	the international trading center of P. notoginseng,Wenshang, Yunnan province then powdered for further use.	ethanol	RSM	washed in distilled water, and surface water was removed. The fresh stem leaf of P. notoginseng was dried to a constant weight in 60 ◦C, and were then powdered	tyrosinase activity，antioxidant	in vitro	B16 cells	China	2018	Dai C-Y, Liu P-F, Liao P-R, Qu Y, Wang C-X, Yang Y, et al.	\	Optimization of Flavonoids Extraction Process in Panax notoginseng Stem Leaf and a Study of Antioxidant Activity and Its Effects on Mouse Melanoma B16 Cells
8	herbal extract	crude extract	Unknown	Pistacia atlantica Desf.	collected in May 2014 from Bardaskan Mountains, Khorasan Razavi province	methanol，MeOH, n-hexane, CH2Cl2, BuOH, EtOAc, and H2O	Unknown	Unripe fruit of P. atlantica subsp. mutica (200 g) were grounded by a blender (Toos chekan Co, I.R. Iran) and then percolated with MeOH at room temperature for 24 h according to the previously reported protocol(14). After extraction, the solvent was evaporated using rotary evaporator and then freeze-dried. Methanol extract (94 g) was further fractionated by solvent-solvent partition to give five …	tyrosinase activity，antioxidant	in vitro	mushroom tyrosinase，B16F10 cells	Iran	2018	Eghbah-Feriz S, Taleghani A, Al-Najjar H, Emami SA, Rahimi H, Asili J, et al.	\	Anti-melanogenesis and anti-tyrosinase properties of Pistacia atlantica subsp. mutica extracts on B16F10 murine melanoma cells
9	herbal extract	crude extract	Unknown	Unknow,26 seaweeds	collected from the Kuwait coast of Arabian Gulf	water, 50% ethanol, absolute ethanolic	UHPLC	provided	tyrosinase activity，antioxidant	in vitro	Other	Kuwait	2019	Farvin KHS, Surendraraj A, Al-Ghunaim A, Al-Yamani F	\	Chemical profile and antioxidant activities of 26 selected species of seaweeds from Kuwait coast
10	fucoidans	ingredient	Unknown	Chnoospora minima，Sargassum polycystum	harvested in Sri Lanka and to evaluate their cosmetizing properties	ethanol	FTIR	The sample was washed with tap water, dried by lyophilization and ground into a powder. Ground algae powder was suspended and kept for 8 h in a 10% formaldehyde in 95% ethanol solution. After filtering off the solvent, the powder was extracted three times in succession at room temperature with 95% ethanol to remove excess formaldehyde, pigments, lipids and other interfering phenolic metabolites. …	tyrosinase activity，antioxidant	in vivo	zebrafish	Coperative:Korea,Sri Lanka	2018	Fernando IPS, Sanjeewa KKA, Samarakoon KW, Kim H-S, Gunasekara UKDSS, Park Y-J, et al.	\	The potential of fucoidans from Chnoospora minima and Sargassum polycystum in cosmetics: antioxidant, anti-inflammatory, skin-whitening, and antiwrinkle activities
11	ceramide，herbal extract	ingredient，crude extract	Unknown	rice, wheat, maize	The yeast extract 98 (containing 34% ceramide) and ceramide-free yeast extract were provided by Kohjin 99 Life Sciences Co., Ltd. (Tokyo, Japan). Purified ceramides (≥ 98%) derived from 00 mushrooms (primary ceramide structure: 9-Me d18:2/16h:0), rice (d18:2/20h:0), wheat 01 (d18:1/16h:0), and maize (d18:2/20h:0) were purchased from Nagara Science Co., Ltd. 02 (Gihu, Japan) (Nagara Science Co., L…	Unknown	Unknown	Unknown	tyrosinase activity，tyrosinase independent pathways	in vitro	B16 cells	Japan	2018	Fukunaga S, Wada S, Aoi W, Osada-Oka M, Minamiyama Y, Ichikawa H, et al.	\	Effect of melanogenesis inhibition by a yeast extract in comparison to that by other food extracts, and its mechanism of action
12	herbal extract	crude extract	Unknown	Paeonia decomposita Hand.-Mazz.，Paeonia ostii T.Hong & J.X.Zhang	purchased from a local company lo_x0002_cated in Dianjiang, Chongqing Municipality, China, and were veri_x0002_fied by Dr. Heng-Xing Zhu from the Forestry Research Institute of Chongqing.	ethanol,EtOAc,water	Unknown	The various air-dried parts from the flowers of P. decomposita (Pd) and P. ostii (Po) were pulverized. These samples were then ex_x0002_tracted thrice (every 7 days) with 75% ethanol at room tempera_x0002_ture. The extracts were concentrated under reduced pressure to generate the EtOH extracts.	tyrosinase activity， CREB/MITF	in vitro	B16 cells	China	2019	Guo L, Yin Z, Wen L, Xin J, Gao X, Zheng X	\	Flower extracts from Paeonia decomposita and Paeonia ostii inhibit melanin synthesis via cAMP-CREB-associated melanogenesis signaling pathways in murine B16 melanoma cells
13	herbal extract	crude extract	Unknown	Sorghum bicolor (L.) Moench	Unknown	ethanol	UPLC-IMS-QTOF/MS2	S. bicolor (20 g) was extracted with various ethanol concentration (0, 20, 40, 60, 80 and 95%; 1L) at 40°C for 2 h using a reflux condenser. The extracts were filtered using a filter paper (Whatman International Limited, Kent, UK), and concentrated using a vacuum evaporator (N-1000; EYELA Co., Tokyo, Japan). After, the extracts were lyophilized using a vacuum freeze dryer (Il Shin Lab Co., Ltd., …	tyrosinase activity，antioxidant,MITF	in vitro	B16 cells	Korea	2020	Han HJ, Park SK, Kang JY, Kim JM, Yoo SK, Heo HJ	\	Anti-Melanogenic Effect of Ethanolic Extract of Sorghum bicolor on IBMX-Induced Melanogenesis in B16/F10 Melanoma Cells
14	herbal extract	crude extract	Unknown	Cinnamomoum osmophloeum Kanehira	from a 13-year-old COK tree in Taiwan (No.186, Yongping Road, Zhongliao Township, Nantou County, Taiwan)	water	GC/MS	Leaves were air-dried. Using a stainless-steel grinder, the leaves were then ground into a fine powder (less than < 10 mesh) and were then stored at room temperature. Next, 3.5 kg of dried COK leaf powder was extracted using steam distillation for 4 h. This process was repeated four times. Using vacuum, the extract was filtered and then, using a rotary evaporator, dry extract was obtained (Figure…	tyrosinase activity， MITF	in vitro	mushroom tyrosinase，B16F10 cells	China	2019	Ho Y-S, Wu J-Y, Chang C-Y	\	A New Natural Antioxidant Biomaterial from Cinnamomum osmophloeum Kanehira Leaves Represses Melanogenesis and Protects against DNA Damage
15	salacinol	ingredient	Unknown	Salacia alata De Wild.	Unknown	ethyl acetate，methanol	NMR and MS spectra	Salacinol and kotalanol were isolated and purified from Salacia extract using preparative chromatography. Dried Salacia extract was separated with ethyl acetate/methanol following which the methanol fraction was concentrated under reduced pressure and subjected to preparative chromatography with an amide column (TOSOH TSKgel Amide-80).	tyrosinase activity，tyrosinase oligosaccharide processing	in vitro	human melanocytes，B16 cells	Japan	2020	Homma T, Kageyama S, Nishikawa A, Nagata K	\	Anti-melanogenic activity of salacinol by inhibition of tyrosinase oligosaccharide processing
16	herbal extract	crude extract	Unknown	Phellinus vaninii	obtained from Mushroom Research Institute of Gyeonggi Agricultural Technology Institute in Korea.	methanol，water	Folin-Ciocalteu assay，aluminum chloride (AlCl3) colori_x0002_metric assay	The fruiting bodies were air-dried (45 _x0001_C for 48 h) and finely pulverized. To prepare the methanol extract (ME), 20 g of the powder in 400 mL of 80% metha_x0002_nol was kept in an orbital shaker (125 rpm) for 24 h at 25 _x0001_C. The solution was filtered through filter paper. To obtain the hot water extract (HE), the same amount of the powder was boiled for 3 h with 400 mL of deionized dis…	tyrosinase activity，antioxidant,MITF	in vitro	mushroom tyrosinase，B16F10 cells	Korea	2019	Im KH, Baek SA, Choi J, Lee TS	\	Antioxidant, Anti-Melanogenic and Anti-Wrinkle Effects of Phellinus vaninii
17	herbal extract	crude extract	Unknown	Sargassum vachellianum，Sargassum horneri，Sargassum hemiphyllum	Sargassum vachellianum, Sargassum horneri, and Sargassum hemiphyllum were collected from Nanao’ island, Shantou, China.	ethanol	HPLC，FTIR	The crude polysaccharide was extracted from Sargassum vachellianum, Sargassum horneri and Sargassum hemiphyllum using hot water according to Chen et al. [18]. Briefly, seaweeds were dried and crushed into powder. A 10 g of seaweed powder was soaked in 10% formaldehyde in 95% ethanol for 12 h to remove the polyphenols and pigments. Then washed with ethanol to remove formaldehyde and the residue wa…	tyrosinase activity，antioxidant	in vitro	mushroom tyrosinase	China	2019	Jesumani V, Du H, Pei P, Zheng C, Cheong K-L, Huang N	\	Unravelling property of polysaccharides from Sargassum sp. as an anti-wrinkle and skin whitening property
18	herbal extract	crude extract	Unknown	Halophyte plant：Salsola komarovii，Salicornia europaea，Sonchus brachyotus，Triglochin maritimum，Suaeda japonica，Argusia sibirica，Artemisia scoparia，Vitex rotundifolia，Spartina anglica，Artemisia princeps，Elymus mollis，Calystegia soldanella，Rosa rugosa，Asparagus oligoclonos，Glehnia littoralis，Suaeda maritima，Suaeda glauca，Spergularia marina， Chenopodium glaucum，Atriplex gmelinii，Peucedanum japonicum，…	Seventy percent ethanol extract of 22 HPs used in the present study were kindly provided by the National Mar_x0002_ine Biodiversity Institute of Korea (MABIK)	ethanol	Unknown	Unknown	tyrosinase activity，antioxidant	in vitro	mushroom tyrosinase	Korea	2020	Jiratchayamaethasakul C, Ding Y, Hwang O, Im S-T, Jang Y, Myung S-W, et al.	\	In vitro screening of elastase, collagenase, hyaluronidase, and tyrosinase inhibitory and antioxidant activities of 22 halophyte plant extracts for novel cosmeceuticals
19	herbal extract	crude extract	Unknown	Euphorbia maculata L.	provided by Wonkwang pharmaceutical com_x0002_pany (Iksan, Jeonbuk, Korea).	ethanol	GC/MS	The aerial parts (stem and leaf) of ES (250 g) were boiled with 70% ethanol at 70 ° C for 2 h. After filtration, the residue was again boiled twice as described above. The combined filtrates were evaporated at 45 °C and lyophilized to obtain the crude extract at a yield of 60 g (24%).	tyrosinase activity，antioxidant,MITF	in vitro	mushroom tyrosinase，B16F10 cells	Korea	2018	Kang S-H, Jeon Y-D, Cha J-Y, Hwang S-W, Lee H-Y, Park M, et al.	\	Antioxidant and skin-whitening effects of aerial part of Euphorbia supina Raf. Extract
20	Essential Oils	crude extract	Unknown	Chrysanthemum boreale MAKINO	CBM was cultivated in a practice farm of the Depart_x0002_ment of Cosmetic Science, Hoseo University, Asan, Korea, and identified by Jong-Cheol Yang, Division of Forest Biodiversity and Herbarium, Korea National Arboretum.	steam distillation	GC/MS	CBMs were obtained in samples 5 cm long from their top parts at three different stages (5 cm from top at vegetative stage; 5 cm from flower top at full-flowering; 5 cm from flower bud top at pre-flowering) and placed in the shade at room temperature for 6 h. The CBM was subjected to conventional steam dis_x0002_tillation to extract EO. The yield of EO is expressed as a volume/weight percentage, a…	tyrosinase activity，antioxidant,MAPKs	in vitro	mushroom tyrosinase，B16B16 cells	Coperative:Korea，China	2018	Kim D-Y, Won K-J, Hwang DI, Park SM, Kim B, Lee HM	\	Chemical Composition, Antioxidant and Anti-melanogenic Activities of Essential Oils from Chrysanthemum boreale Makino at Different Harvesting Stages
21	Phlorotannin	ingredient	Unknown	Ecklonia cava	E.cava was purchased from a herbal market in Jeju Island, Korea, on May 2015. One of the author (Prof. Y.H. Kim) identified this brown algal species.	ethyl acetate,ethanol	TLC	The dried powder (1.0 kg) of E. cava was refluxed with 80% EtOH (16 L) for 72 h, and the ethanol extract was concentrated under vacuum to yield a dark green residue (290.0 g). The residue (290.0 g) was suspended in H2O (2.0 L), and the aqueous layer was partitioned with n-hexane, ethyl acetate, and n-butanol.	tyrosinase activity,Slow-Binding Inhibition of Tyrosinase	in vitro	mushroom tyrosinase	Korea	2019	Kim JH, Lee S, Park S, Park JS, Kim YH, Yang SY	\	Slow-Binding Inhibition of Tyrosinase by Ecklonia cava Phlorotannins
22	herbal extract	crude extract	Unknown	Oenothera laciniata Hill	Methanol extract of the O. lac_x0002_iniata plant was obtained from the Korea Plant Extract Bank (Daejeon, Korea). Whole O. laciniata plants were col_x0002_lected from Sanyang-ri, Hangyeong-myeon, Buk Jeju-gun, Jeju-city, Korea.	methanol	Folin and Denis assay	Pulverized samples (70 g) were added to a flask and subjected to extraction thrice for 24 hr each time with 1 L of 100% methanol at 45oC. The extract was fil_x0002_tered through filter paper, concentrated using a rotary vac_x0002_uum evaporator, and dried. The yield of the O. laciniata methanol extract was 12.26%.	tyrosinase activity,MITF	in vitro	melan-a cells	Korea	2017	Kim SE, Lee CM, Kim YC	\	Anti-Melanogenic Effect of Oenothera laciniata Methanol Extract in Melan-a Cells
23	herbal extract	crude extract	Unknown	Aurea Helianthus	Unknown	ethanol	HPLC	Aurea Helianthus stems (100 g) were extracted in 70% (v/v) ethanol for 5h at 60°C. The ethanol extract was filtered and then evaporated under a vacuum at 60°C.	tyrosinase activity,MITF	in vitro	B16 cells	Korea	2018	Kim Y, Lee S, Ryu JH, Yoon KD, Shin SS	\	Effect of Aurea Helianthus stem extract on anti-melanogenesis
24	herbal extract	crude extract	Unknown	Sageretia thea (Osbeck) M.C. Johnst.	Sageretia thea fruit was harvested from Seogwang, Jeju Island, South Korea in May 2014. Botanical samples were identified taxonomically by Dr. Hui Kim, Mokpo National University, Korea.	methanol	TLC,GC/MS	Sageretia thea fruit (10 kg) was extracted with 80% aqueous methanol for 24 h. After concentrating the methanol extract, the crude extract (1.6 kg) was partitioned with n-hexane, chloroform, ethyl acetate, n-butanol, and water. The fractions were generated using 18 g of n-hexane, 3.6 g of chloroform, 20.9 g of ethyl acetate, 135.0 g of n-butanol, and 1,422.5 g of water. The n-hexane fraction was …	tyrosinase activity,Akt/GSK3β/β-catenin/MITF	in vitro	mushroom tyrosinase，B16F10 cells	Korea	2018	Ko G-A, Shrestha S, Cho SK	\	Sageretia thea fruit extracts rich in methyl linoleate and methyl linolenate downregulate melanogenesis via the Akt/GSK3 beta signaling pathway
25	Swertiajaponin	ingredient	Unknown	Unknown	commercially available	Unknown	Unknown	Unknown	tyrosinase activity，antioxidant,MAPKs/MITF	in vitro	mushroom tyrosinase，B16F10 cells，human skin model	Korea	2017	Lee B, Moon KM, Lee B-S, Yang J-H, Park KI, Cho W-K, et al.	\	Swertiajaponin inhibits skin pigmentation by dual mechanisms to suppress tyrosinase
26	herbal extract	crude extract	Unknown	Poriacocos(Schw.)Wolf.	Unknown	Unknown	Unknown	Unknown	tyrosinase activity,MITF	in vitro	B16F10 cells	Korea	2018	Lee H, Cha HJ	\	Poria cocos Wolf extracts represses pigmentation in vitro and in vivo
27	ingredient	ingredient	Unknown	Achillea alpina L.	A. alpina plants were collected in June 2016 from Jangheung, Jeonnam province located on Korea and identified by Professor Hui Kim (Mokpo National University, Korea).	methanol	HPLC， LC-IT-TOF MS	The aerial parts of A. alpina (1.4 kg) were extracted with methanol (4 L, 3 times) under reflux, and the mixture was filtered and concentrated. The methanol extract (237 g) was suspended in H2O (2.5 L) and then successively partitioned with n-hexane, yielding 40 g and 180 g, respectively.	tyrosinase activity，antioxidant	in vitro	B16F10 cells	Korea	2019	Lee HJ, Sim MO, Woo KW, Jeong D-E, Jung HK, An B, et al.	\	Antioxidant and Antimelanogenic Activities of Compounds Isolated from the Aerial Parts of Achillea alpina L
28	herbal extract	crude extract	Unknown	Panax ginseng C.A.Mey.	Korean ginseng calyx was harvested	ethanol	HPLC	Korean ginseng calyx was harvested and dried in hot air and refluxed with 70% ethanol for 10 h. After the extract was filtered and concentrated under reduced pressure at 45_x0001_C, Pg-C-EE powder was finally prepared by lyophilization and stored at 20_x0001_C until it was used.	tyrosinase activity，antioxidant,CREB，MAPKs/MITF	in vitro	B16F10 cells	Korea	2018	Lee J-O, Kim E, Kim JH, Hong YH, Kim HG, Jeong D, et al.	\	Antimelanogenesis and skin-protective activities of Panax ginseng calyx ethanol extract
29	herbal extract	crude extract	Unknown	Kummerowia striata (Thunb.) Schindl.	The aerial parts of K. striata (Thunb. ex Murray) Schindler were collected at Gimpo, Gyeonggi, South Korea in September 2013 and identified by Professor Joa Sub Oh, College of Pharmacy, Dankook University, Cheonan, South Korea.	ethanol	Unknown	The aerial parts of K. striata (Thunb.ex Murray) Schindler (1.8 kg) were extracted with 70% EtOH (3 × 18 L) at room temperature. The combined EtOH extracts were then concentrated in vacuo at 40 °C to yield 180 g of residue. The EtOH extract was suspended in distilled water and then partitioned sequen_x0002_tially with dichloromethane (CH2Cl2), ethyl acetate (EtOAc), and n_x0002_butanol (n-BuOH). …	tyrosinase activity，antioxidant，MITF	in vitro	mushroom tyrosinase，B16F10 cells	Korea	2019	Lee JY, Cho Y-R, Park JH, Ahn E-K, Jeong W, Shin HS, et al.	\	Anti-melanogenic and anti-oxidant activities of ethanol extract of Kummerowia striata: Kummerowia striata regulate anti-melanogenic activity through down-regulation of TRP-1, TRP-2 and MITF expression
30	Pectolinarigenin	ingredient	Unknown	Cirsium setidens (Dunn) Nakai	The dried aerial parts of Cirsium setidens (Dunn) Nakai were purchased at Jeongseon Herb market (Jeongseon, Korea) in June 2016 and identified by Prof. Eun Ju Jeong of the Department of Agronomy and Medicinal Plant Resources, Gyeongnam University of Science and Technology.	water	HPLC，LC/MS	Dried aerial parts (100 g) of C. setidens were extracted thrice with water (1 L) under heating for 3 h. The hot-water extract was concentrated under reduced pressure to yield a water extract (13.7 g) for further study.	tyrosinase activity,MITF	in vitro	melan-a cells，human skin model	Korea	2017	Lee S, Lee D-H, Kim J-C, Um BH, Sung SH, Jeong LS, et al.	\	Pectolinarigenin, an aglycone of pectolinarin, has more potent inhibitory activities on melanogenesis than pectolinarin
31	herbal extract	crude extract	Unknown	Zanthoxylum schinifolium Siebold & Zucc.	Z. schinifolium was purchased from Songpung-ri, Yongdam_x0002_myeon, Jinan-gun, Jeollabuk-do, Korea.	water	UPLC	A suspension of 10 g of Z. schinifolium powder in sterile distilled water (200 mL) was taken in a 250 mL Erlenmeyer flask and auto_x0002_claved at 121_x0002_C for 15 min. After cooling, the potential isolate (3% v/v, 107 CFU/mL) was aseptically inoculated into the flasks and incubated at varying temperatures (25_x0002_C, 30_x0002_C and 37_x0002_C) for 1e7 days with a continuous agitation of 250 r…	tyrosinase activity，antioxidant,	in vitro	mushroom tyrosinase，B16F10 cells	Korea	2019	Lee S-W, Lim J-M, Mohan H, Seralathan K-K, Park Y-J, Lee J-H, et al.	\	Enhanced bioactivity of Zanthoxylum schinifolium fermented extract: Anti-inflammatory, anti-bacterial, and anti-melanogenic activity
32	(1E,4E,6E)-1,7-bis (4-hydroxyphenyl)-1,4,6-heptatrien-3-one，herbal extract	ingredient，crude extract	Unknown	Zingiber cassumunar Roxb.	Fresh rhizomes of Z. cassumunar Roxb. were collected from the Dai hospital in Dai Autonomous Prefecture of Xishuangbanna, Yunnan Province of China and identified by Professor ShengJi Pei.	ethyl acetate, petroleum ether	NMR,HPLC,TLC	The air-dried and powdered rhizomes (4.5 kg) of Z. cassumunar were extracted three times with 95% ethanol (4 × 6 L) at the room tem_x0002_perature. The combined filtrate was concentrated by rotary evaporator under reduced pressure to obtain ethanol extract. Then, the ethanol extract was suspended in 1 L water and sequentially extracted with 1 L petroleum ether (PE), 1 L chloroform (CHCl3) and 1 L…	tyrosinase activity，antioxidant	in vitro	mushroom tyrosinase	China	2019	Li M-X, Bai X, Ma Y-P, Zhang H-X, Nama N, Pei S-J, et al.	\	Cosmetic potentials of extracts and compounds from Zingiber cassumunar Roxb. rhizome
33	paeonol，herbal extract	ingredient，crude extract	Unknown	Paeonia × suffruticosa Andrews	Unknown	ethanol,water	HPLC	25 g of CM was ground into a 30‐mesh powder and extracted by ultrasonication in 250 mL of water or 95% ethanol for 60 minutes. The extraction process was repeated, and the extraction fluids were combined. The fluids were concentrated under reduced pressure and freezedried.	tyrosinase activity，antioxidant	in vitro	mushroom tyrosinase，A2058 human melanoma cells	China	2019	Lin D, Wang S-H, Song T-Y, Hsieh C-W, Tsai M-S	\	Safety and efficacy of tyrosinase inhibition of Paeonia suffruticosa Andrews extracts on human melanoma cells
34	herbal extract	crude extract	Unknown	Vitis vinifera L.	purchased from Healthmate (Changhua, Taiwan)	water	HPLC	Te solvent used for RVLE preparation was deionized water. Two grams of RVLE was sonicated in an ultrasonic bath (Chrom Tech) for 40 min with 98 mL of deionized water. Te suspension was centrifuged at 6000 rpm (HERMLE 2206A) for 15 min. Te supernatant was collected and run through a 0.45 m flter.	tyrosinase activity	in vitro	mushroom tyrosinase	China	2017	Lin Y-S, Chen H-J, Huang J-P, Lee P-C, Tsai C-R, Hsu T-F, et al.	\	Kinetics of Tyrosinase Inhibitory Activity Using Vitis vinifera Leaf Extracts
35	polysaccharide	ingredient	Unknown	Cuscuta chinensis Lam.	The medicinal materials of Cuscuta chinensis Lam seeds were provided from Guang Dong Feng Chun Phar_x0002_maceutical CO., LTD (China).	ethanol	SEC-MALLS-RI	About 500 g dry materials were powdered, and soaked with 1200 mL 80% ethanol for 24 h under room temperature to remove lipids, oligo_x0002_saccharides, and colored materials. The pretreated samples were filtrated with cloth, and then the dried residue was extracted with 3000 mL water at 90°C for three times. The aqueous extracts were separated from the residue by centrifugation (4000 g for 5 min …	tyrosinase activity，antioxidant，MITF	in vitro	mushroom tyrosinase，B16F10 cells	China	2018	Liu Z-J, Wang Y-L, Li Q-L, Yang L	\	Improved antimelanogenesis and antioxidant effects of polysaccharide from Cuscuta chinensis Lam seeds after enzymatic hydrolysis
36	herbal extract	crude extract	Unknown	Pradosia mutisii Cronquist	A 95% methanol extract of P. mutisii (Pm-EE) was purchased from Korea Plant Extract Bank (Daejeon, Korea, http://extract.kribb.re.kr/, E-mail: plantext@kribb.re.kr).	methanol	UPLC/HRMS	Unknown	tyrosinase activity，antioxidant,MAPKs	in vitro	mushroom tyrosinase，B16F10 cells	Korea	2019	Lorz LR, Yoo BC, Kim M-Y, Cho JY	\	Anti-Wrinkling and Anti-Melanogenic Effect of Pradosia mutisii Methanol Extract
37	herbal extract	crude extract	Unknown	Annona muricata L.	Annona muricata L. was imported from Malaysia and then identified from the department of life sciences, The Islamia University of Bahwalpur, Pakistan with voucher number 7686/LS.	acetone	Unknown	Annona muricata L. extract was prepared by using cold maceration technique. 100 g of sliced whole fruit (peel, pulp and seed) was macerated in 500ml of acetone (70%) for 72hr at room temperature. The macerate was stirred daily for 30 minutes. The residues were collected by first passing the extract from different layers of muslin cloth and then by filtering through whatman filter no. 1.	antioxidant	in vivo	human volunteers	Pakistan	2018	Meer S, Akhtar N	\	Annona muricata extract containing pharmaceutical emulgels with and without penetration enhancer for depigmenting and antierythmic effects
38	herbal extract	crude extract	Unknown	Prosopis cineraria (Lin.) Druce	The plant material was collected from Cholestane desert of Bahawalpur during the month of March. The identification of Prosopis cineraria stem, leaf and bark was done by Cholestane Institute of Desert Studies (no. Pharm-PC- 00201), The Islamia University of Bahawalpur, Bahawalpur, Pakistan.	ethanol	Folin-Ciocalteu method, aluminium chloride colorimetric method	Each part of the plant was grinded individually until a coarse powder was obtained by using electric grinder (National, Japan). Then the coarse powder of each part was socked in 70% ethanol in a glass beaker and sealed with aluminium foil and kept for 3-days with in_x0002_frequent stirring, separately. Next, the socked materials were filtered through two folds of the muslin cloth and followed by …	antioxidant, sunscreen	in vivo	mushroom tyrosinase，human volunteers	Pakistan	2018	Mohammad IS, Naveed M, Ijaz S, Shumzaid M, Hassan S, Muhammad KS, et al.	\	Phytocosmeceutical formulation development, characterization and its in-vivo investigations
39	triterpenic acids，herbal extract	ingredient，crude extract	Unknown	Malus domestica Borkh.	10 kg AP (Apple: Malus domestica Borkh.) pomace was collected after the milling and pressing of apples for juice pro_x0002_duction. The AP was collected from a local apple processing business, Uiseong (Gyeongbuk, Korea).	methanol (MeOH), ethanol (EtOH), chloroform (ChLf), ethyl acetate (EtOAc), n-hexane (Hex)	HPLC-MS	During extraction, the 100 g AP sample was ground to a fine powder Fig. 1. Generation of apple pomace during the processing of apples to produce different byproducts. S.H. Nile, et al. Food and Chemical Toxicology 131 (2019) 110563 2using a laboratory grinder (Panasonic Super Mixer Grinder (MX_x0002_AC555), and 10 g of the AP powder was added to 100 mL MeOH in a conical flask. After proper mixing…	tyrosinase activity，antioxidant	in vitro	mushroom tyrosinase	Coperative:China,Korea	2019	Nile SH, Nile A, Liu J, Kim DH, Kai G	\	Exploitation of apple pomace towards extraction of triterpenic acids, antioxidant potential, cytotoxic effects, and inhibition of clinically important enzymes
40	herbal extract	crude extract	Unknown	Onosma heterophylla Griseb.	Aerial parts of O. heterophyllum were collected from Gencali village, Suhut-Senirkent highway, Isparta-Turkey on 12 June 2014 (between 40.–50. km, 1366 m, 38° 14′ 26′′N 30° 39′ 58′′E). Taxonomic identifi_x0002_cation of the plant material was carried out by a senior taxonomist, Dr. Olcay Ceylan, from the Department of Biology, Mugla University, Mugla-TURKEY.	ethyl acetate, methanol，water	RP-HPLC	air-dried samples (20 g) obtained from the aerial parts of O. heterophyllum were individually extracted with 250 ml of ethyl acetate and methanol for 5 h by using a Soxhlet extractor. To obtain the water extract, the air-dried sample (20 g) was extracted with 400 ml of boiling deionized water for 15 min. Ethyl acetate and me_x0002_thanol were then removed by using a rotary evaporator (Zengin et a…	tyrosinase activity，antioxidant	in vitro	mushroom tyrosinase	Turkey	2018	Ozer MS, Kirkan B, Sarikurkcu C, Cengiz M, Ceylan O, Atilgan N, et al.	\	Onosma heterophyllum: Phenolic composition, enzyme inhibitory and antioxidant activities
41	herbal extract	crude extract	Unknown	Inula britannica L.	I. britannica was harvested in the Namwon re_x0002_gion, Korea, and was obtained from the Herb King_x0002_dom Agriculture Corporation in Namwon, Korea.	water	Folin-Ciocalteu reagent method	The dried petals of I. britannica (20 g, moisture content 9.2% (w/w)) were extracted with 500 ml distilled water for 24 h at 60 °C in a water bath. After extraction, the slurry was filtered through a Whatman No. 2 filter paper (extract I) and extraction of this slurry was performed twice and the resulting extracts were gathered and stored in a deep freeze at −20 °C before use.	tyrosinase activity	in vitro	mushroom tyrosinase，B16F10 cells	Korea	2017	Park E-h, Bae W-y, Kim J-y, Kim K-t, Paik H-d	\	Antimelanogenic effects of Inula britannica flower petal extract fermented by Lactobacillus plantarum KCCM 11613P
42	ferulic acid	ingredient	Unknown	Tetragonia tetragonioides (Pall.) Kuntze	Unknown	Unknown	FAB–MS	The bioactive compound was isolated from T. tetrago_x0002_nioides using Sephadex LH-20, MIC-gel CHP-20, and open column chromatography.	tyrosinase activity,MITF	in vitro	B16F10 cells	Korea	2018	Park H-J, Cho J-H, Hong S-H, Kim D-H, Jung H-Y, Kang I-K, et al.	\	Whitening and anti-wrinkle activities of ferulic acid isolated from Tetragonia tetragonioides in B16F10 melanoma and CCD-986sk fibroblast cells
43	herbal extract	crude extract	Unknown	Sucrier banana (musa spp.)	Totally ripped (7 days after harvesting) Sucrier banana (musa spp.) peels from Kampangpetch Province, Thailand.	methanol,ethanol	Unknown	Washed banana peels with water then sun-baked until totally dried, grinded by blender and extracted by soaking with 60% methanol for 24 hours (MW24), centrifuged with 95% ethanol for 10 minutes at 4 ℃(E4), boiling in DI water at 60 ℃ for 20 minutes (W60) and boiling in 95% methanol at 60 ℃ for 20 minutes (M60). Next step was to decrease the volume with rotary evaporator at 40 ℃ and was to dry by …	tyrosinase activity,MITF,MAPKs	in vitro	B16F10 cells	Coperative:Thailand,China	2019	Phacharapiyangkul N, Thirapanmethee K, Sa-Ngiamsuntorn K, Panich U, Lee C-H, Chomnawang MT	\	Effect of Sucrier Banana Peel Extracts on Inhibition of Melanogenesis through the ERK Signaling Pathway
44	herbal extract	crude extract	Unknown	Prunus mume (Siebold) Siebold & Zucc.	Prunus mume was sup_x0002_plied by the Institute of Native Genetic Resources Inc. (Yongin, Korea).	water	Unknown	Dried powder was extracted via water ultrasonication at room temperature overnight four times, followed by filtration. The resulting extracts were freeze-dried and incubated at −20 °C until use.	antioxidant,tyrosinase activity,MITF,MAPKs	in vitro	B16F10 cells	Korea	2017	Pi K, Lee K	\	Prunus mume extract exerts antioxidant activities and suppressive effect of melanogenesis under the stimulation by alpha-melanocyte stimulating hormone in B16-F10 melanoma cells
45	herbal extract	crude extract	Unknown	Arthrospira platensis	The A. platensis species (UTEX LB 2340 from UTEX Culture Collec_x0002_tion of Algae at The University of Texas at Austin) was grown in Zarrouk medium which is specified in many literatures at 30 ± 2 °C and 12 h light/12 h dark photoperiod conditions.	water,ethanol	HPLC	The culture was harvested when they reached to the saturation, then the obtained biomass sample was lyophilized at −52 °C (Labconco 7670530, FreeZone). The lyophilized sample was extracted with ethanol or distilled water for 12 h in dark at 50 °C in a temperature controlled shaker (Memmert, SV 1422). After the biomass and the extract were separated by centrifugation at 5000 rpm for 10 min, the et…	tyrosinase activity，antioxidant	in vitro	mushroom tyrosinase	Turkey	2018	Sahin SC	\	The potential of Arthrospira platensis extract as a tyrosinase inhibitor for pharmaceutical or cosmetic applications.
46	herbal extract	crude extract	Unknown	Gastrodia elata Blume	GEB were obtained from the Hyewonchunma Farm (Chuncheon, Korea).	water	Unknown	The dried GEB (42°C for 16 h) were ground and then GEB powder (10 g) was extracted in 200 mL of de-ionized H2O at 90°C for 3 h, followed by centrifugation at 4,500 rpm. The supernatant was filtered using filter paper with 6 μm pore size (No. 3; Whatman, Little Chalfont, England), and concentrated under vacuum using a rotary evaporator (Rotavapor R-100; Buchi, Flawil, Switzerland). The frozen extr…	tyrosinase activity,MITF	in vitro	B16F10 cells	Korea	2017	Shim E, Song E, Choi KS, Choi H-J, Hwang J	\	Inhibitory effect of Gastrodia elata Blume extract on alpha-melanocyte stimulating hormone-induced melanogenesis in murine B16F10 melanoma
47	herbal extract	crude extract	Unknown	Phragmites communis	Young leaves of reed (Phragmites communis, YLR) were obtained from the Suncheon area, Republic of Korea, in May to June of 2015.	water	Unknown	The dried YLR (300 g) was extracted with 6 L of water at 100 _x0001_C for 3 h. This extraction process was repeated three times, after which the extract was filtered through Whatman No. 1 filter paper, evaporated under a vacuum at 60 _x0001_C, and further dried to powder using a freeze-dryer at _x0004_50 _x0001_C (yield 11.62%). The total polyphenol and flavonoid contents of YLR extract were 34.1…	tyrosinase activity,MAPKs/CREB,MITF	in vitro	B16F10 cells	Korea	2017	Sim M-O, Ham JR, Lee M-K	\	Young leaves of reed (Phragmites communis) suppress melanogenesis and oxidative stress in B16F10 melanoma cells
48	(E)-Cinnamaldehyde,(E)-cinnamyl acetate，essential oil	ingredient，crude extract	Unknown	Cinnamomum zeylanicum Blume	The barks of C. zeylanicum were purchased from a local market in Kilis-TURKEY in June 2018.	hydrodistillation	GC–MS	100 g of bark was subjected to hydrodistillation for 3 h by using a British-type Clevenger apparatus (ILDAM Ltd., Ankara-Turkey) and a light red essential oil was obtained. The oil were dried over anhydrous sodium sulphate and after filtration, stored at +4 °C until tested and analysed.	tyrosinase activity，antioxidant	in vitro	mushroom tyrosinase	Turkey	2020	Tepe AS, Ozaslan M	\	Anti-Alzheimer, anti-diabetic, skin-whitening, and antioxidant activities of the essential oil of Cinnamomum zeylanicum
49	volatile oil	crude extract	Unknown	Zingiber officinale Roscoe	Laiwu ginger (Zingiber officinale ROSCOE) was purchased from Tianjin 88 (China).	supercritical CO2 fluid extraction	GC–MS	The air-dried roots of ginger were ground in an attrition mill and sieved with a 92 60 to 80 mesh wire screen. The supercritical CO2 fluid extraction procedure was 93 performed at the pressure of 35 MPa and temperature of 35 ℃ and flow of 15 L/h 94 for CO2 and total processing time of 120 min. The volatile oil from ginger was 95 collected in amber vials and the volatile oil solution was prepared …	tyrosinase activity，antioxidant,MAPKs	in vitro	B16 cells	China	2018	Wang L-X, Qian J, Zhao L-N, Zhao S-H	\	Effects of volatile oil from ginger on the murine B16 melanoma cells and its mechanism
50	herbal extract	crude extract	Unknown	Phyllanthus emblica L.	Unknown	water	Unknown	P. emblica fruits were frozen at − 35 ℃ for 10–12 h and then dried at 60 ℃ ± 5% for 35 h with a moisture content of 5% or less. Dried fruits were extracted with 85–95 ℃ hot water at 5 l per kilogram of fruit making a liquid extract with 5% of soluble content. The extract was filtered through a 10 µm PP (polypropylene) filter bag to remove in_x0002_solubles. After vacuum concentration, the concent…	tyrosinase activity，MITF	in vitro	mushroom tyrosinase，B16F10 cells	China	2019	Wang Y-C, Haung X-Y, Chiu C-C, Lin M-Y, Lin W-H, Chang W-T, et al.	\	Inhibitions of melanogenesis via Phyllanthus emblica fruit extract powder in B16F10 cells
51	Fucoidan	ingredient	Unknown	Fucus vesiculosus L.	purchased from Sigma.	purchased from Sigma.	purchased from Sigma.	purchased from Sigma.	tyrosinase activity，MITF	in vitro	B16 cells	China	2017	Wang Z-J, Xu W, Liang J-W, Wang C-S, Kang Y	\	EFFECT OF FUCOIDAN ON B16 MURINE MELANOMA CELL MELANIN FORMATION AND APOPTOSIS
52	herbal extract	crude extract	Unknown	Citus sinesis L.	California Navel orange peel (Citus sinesis L.) was the waste derived from orange juice process. It was collected from fruit juice shop at CentralPlaza, Chiang Rai during August-September 2012.	ethanol	Unknown	Orange peel was cut into small pieces and dried in hot air oven at 50oC for 48 hours. Dried orange peel was soaked in 95% ethanol in the ratio of 1:3 and incubated in incubator shaker at 25oC, 150 rpm for 72 hours then fltered through Whatman® No.1. The fltrate was evaporated under pressure by rotary evaporator to yield crude extract and kept in -4oC refrigerator until used.	tyrosinase activity	in vivo	mushroom tyrosinase,human volunteers	Thailand	2017	Wuttisin N, Boonmak J, Thaipitak V, Thitilertdecha N, Kittigowittana K	\	Anti-tyrosinase activity of orange peel extract and cosmetic formulation
53	herbal extract	crude extract	Unknown	Plantago asiatica L.	cultivated directly at a farm in Seocho-dong, Seoul.	ethanol	Unknown	1 kg of starch was collected and the leaves, roots, 86 and seeds of the P. asiatica L were removed. Four times the amount of a 95% ethanol solution was added 87 to each sample, then they were filtered at room temperature for a week, filtered out with a wattman No. 2, 88 and then frozen with sterilized filter paper. Ethanol was removed by using a rotavapor (50–55 rpm) and 89 an extract of 5.14 g w…	tyrosinase activity，antioxidant	in vitro	mushroom tyrosinase，B16F10 cells,RAW 264.7 cells	Korea	2019	Yoon M-Y, Kim H-J, Lee S-J.	\	The effect of antioxidant and whitening action on Plantago asiatica L. leaf ethanol extract for health care
54	herbal extract	crude extract	Unknown	Hippophae rhamnoides L.	SBSR, the main by-product of the supercritical extraction line of sea buckthorn seed, was obtained from General Health Bioscience Co., LLC (Xining, China).	ethanol	UPLC-QTOF-MS/MS	HYD-SBSR was obtained by using 80% ethanol mixed with the ground powder at a ratio of 8 : 1 (liquid to solid ratio (mL g−1) and extracted for 1.5 h. Next, the extracts were centrifuged at 400g at 4 °C for 15 min, and the supernatant was collected. The extraction was repeated twice and the supernatants were combined. Ethanol was removed by rotary evaporation under vacuum at 40 °C. The obtained lig…	tyrosinase activity，MITF	in vitro	B16F10 cells	China	2018	Zhang J, Wang C, Wang C, Sun B, Qi C	\	Understanding the role of extracts from sea buckthorn seed residues in anti- melanogenesis properties on B16F10 melanoma cells
55	Eight Phellinus linteus-Fermented Traditional Crude Herbal Extracts	formula	Unknown	Glycyrrhiza glabra, Broussonetia kazinoki, Angelica gigas, Atractylodes macrocephala, Poria cocos, Morus alba root bark, Paeonia albiflora, Ligusticum officinale	Eight kinds of traditional Korean herbs (Glycyrrhiza glabra, Broussonetia kazinoki, Angelica gigas, Atractylodes macrocephala, Poria cocos, Morus alba root bark, Paeonia albiflora, and Ligusticum officinale) used in this study were purchased from Hyomin Pharma. Ind. Co., Ltd. (Korea).	Unknown	Unknown	Mycelial culture broth of the eight kinds of traditional crude herbal extracts fermented with P. linteus (previously named as 8-HsPLCB) was prepared by cultivating at 28oC for 9 days according to a previous study [15].	Unknown	in vivo	brown guinea pigs	Korea	2018	Ahn H-Y, Choo Y-M, Cho Y-S	\	Anti-Pigmentation Effects of Eight Phellinus linteus-Fermented Traditional Crude Herbal Extracts on Brown Guinea Pigs of Ultraviolet B-Induced Hyperpigmentation
56	polyphenols，herbal extract	ingredient，crude extract	Unknown	Vicia faba L.	Unknown	Unknown	HR-TOF-MS,NMR/MS	Unknown	Unknown	in vitro	B16F10 cells	Japan	2018	Allam AE, Nafady AM, Nakagawa T, Takemoto N, Shimizu K	\	Effect of polyphenols from Vicia faba L on lipase activity and melanogenesis
57	10 Compounds，herbal extract	ingredient，crude extract	Unknown	Coix lacryma-jobi L.	Unknown	Unknown	HR-ESI-MS	Unknown	Unknown	in vitro	B16F10 cells	Coperative:Japan,Indonesia	2017	Amen Y, Arung ET, Afifi MS, Halim AF, Ashour A, Fujimoto R, et al.	\	Melanogenesis inhibitors from Coix lacryma-jobi seeds in B16-F10 melanoma cells
58	Glyasperin A，herbal extract	ingredient，crude extract	Unknown	Macaranga pruinosa (Miq.) Müll.Arg.	All Macaranga trees were collected in November 2015 from the Forest Education of Mulawarman University, Samarinda, East Kalimantan, Indonesia. The leaves of M. pruinosa were recollected in May 2016 in Samarinda, Indonesia.	methanol	TLC,HPLC	The leaf M. pruinosa (1 kg) was re-extracted into MeOH at 72 hours in room temperature and yielded 128.02 g. About 10 g of extracts were fractionated with silica gel column chroma_x0002_tography (130 g of Wakogel C-200, 4.14 × 50 cm) and eluted with n-hexane/EtOAc in the ratio of 10:0, 9:1, 8:2, 7:3, 6:4, 5:5, 4:6, 3:7, 2:8, 1:9, and 0:10 and EtOAc/MeOH in the ratio of 8:2, 6:4, 4:6, 2:8, and 0:1…	tyrosinase activity，antioxidant	in vitro	mushroom tyrosinase，B16 cells	Coperative:Japan,Indonesia	2019	Arung ET, Sinamabela JR, Rosamah E, Kusuma IW, Kuspradini H, Alam AE, et al.	\	Antioxidant and Antimelanogenesis Activities of Glyasperin A From Macaranga pruinosa Leaves
59	Luteolin	ingredient	Unknown	Luteolin is found in common fruits and vegetables from our daily diet.	Unknown	Unknown	HPLC	Unknown	tyrosinase activity，CREB/PI3K/AKT/MAPKs/MITF	in vitro	B16F10 cells	Korea	2017	Byun E-B, Song H-Y, Mushtaq S, Kim H-M, Kang JA, Yang M-S, et al.	\	Gamma-Irradiated Luteolin Inhibits 3-Isobutyl-1-Methylxanthine-Induced Melanogenesis Through the Regulation of CREB/MITF, PI3K/Akt, and ERK Pathways in B16BL6 Melanoma Cells
60	Gomisin N	ingredient	Unknown	Schisandra chinensis (Turcz.) Baill.	Gomisin N compound was provided by Chul Young Kim (Hanyang University, Ansan, Korea).	provided by Chul Young Kim	Unknown	provided by Chul Young Kim	tyrosinase activity，PI3K/AKT/MAPKs/MITF	in vivo	mushroom tyrosinase，B16F10 cells,MNT1 cells,Zebrafish	Korea	2017	Chae JK, Subedi L, Jeong M, Park YU, Kim CY, Kim H, et al.	\	Gomisin N Inhibits Melanogenesis through Regulating the PI3K/Akt and MAPK/ERK Signaling Pathways in Melanocytes
61	8 Compounds，herbal extract	ingredient，crude extract	Unknown	Ligusticum sinense Oliv.	Dried rhizoma of L. sinense Oliv. was purchased from Sheng Chang Pharmaceutical Co., Ltd., Taoyuan, Taiwan.	methanol,ethyl acetate, n-butanol, water	TLC,HPLC	Dried rhizoma (9.9 kg) of L. sinense was smashed and extracted with methanol (40 L × three times), which was filtered and evaporated to give a black residue (1758 g). This residue was then suspended in H2O (3.0 L) and partitioned with equal volume of ethyl acetate and n-BuOH for three times, successively. Each layer was concentrated under reduced pressure to obtain EtOAc (415 g), n-BuOH (147 g), …	tyrosinase activity	in vivo	B16F10 cells,human skin cells,Zebrafish, human skin equivalents	China	2018	Cheng M-C, Lee T-H, Chu Y-T, Syu L-L, Hsu S-J, Cheng C-H, et al.	\	Melanogenesis Inhibitors from the Rhizoma of Ligusticum Sinense in B16-F10 Melanoma Cells In Vitro and Zebrafish In Vivo
62	cyclocostunolide 2	ingredient	Unknown	Saussurea lappa	The roots of S. lappa were purchased (August 2015) from a herbal medicine store (Marma-Samunprai) in Thailand (Choodej et al. 2018).	provided	provided	The roots of S. lappa were purchased (August 2015) from a herbal medicine store (Marma-Samunprai) in Thailand (Choodej et al. 2018).	Unknown	in vitro	B16F10 cells	Coperative:Japan,Thailand	2019	Choodej S, Pudhom K, Yamauchi K, Mitsunaga T	\	Inhibition of melanin production by sesquiterpene lactones from Saussurea lappa and their analogues
63	Galangin	ingredient	Unknown	Unknown	purchased from Sigma Chemical Co. (St. Louis, MO, U.S.A).	purchased	purchased	purchased	tyrosinase activity	in vivo	mushroom tyrosinase,B16F10 cells,HRM2 hairless mice	Korea	2018	Chung KW, Jeong HO, Lee EK, Kim SJ, Chun P, Chung HY, et al.	\	Evaluation of Antimelanogenic Activity and Mechanism of Galangin in Silico and in Vivo
64	8 Compounds，herbal extract	ingredient，crude extract	Unknown	Manilkara zapota (L.) P.Royen	The bark of M. zapota was collected from Saraburi Province, Thailand, in May 2013.	n-hexane, ethyl acetate, methanol, water	TLC	Fresh M. zapota bark (175 kg) was dried in a hot air oven at 60 °C. The dried M. zapota bark (7 kg) was ground and then extracted with n-hexane (3 × 5 L), EtOAc (3 × 5.5 L), MeOH (3 × 5 L), and water (3 × 3.5 L), respectively, for 72 h at room temperature (37 ± 2 °C). The extract was filtrated and evaporated under reduced pressure to afford n-hexane (140 g, yellow-green gum), EtOAc (138 g, dark g…	tyrosinase activity	in vitro	mushroom tyrosinase,human carcinoma cells,human normal cell line WI-38	Thailand	2019	Chunhakant S, Chaicharoenpong C	\	Antityrosinase, Antioxidant, and Cytotoxic Activities of Phytochemical Constituents from Manilkara zapota L. Bark
65	Crocetin	ingredient	Unknown	Crocus sativus L.	Provided	ethanol	TLC,HPLC	dried stigmas of saffron were washed with ice-cold ethanol 80% in eight steps. The supernatant was kept at -5ºC for 24 days in a dark place. Crocin crystals (yield: 10-15%) were then separated and washed with acetone. Crocin was then hydrolyzed in HCl 33%. After 2 min contact with N2 the solution was kept at 50ºC for 1 h and then centrifuged with 17 ml distilled water (3000 rpm for 10 min). The s…	tyrosinase activity，antioxidant，MITF	in vitro	mushroom tyrosinase，B16F10 cells	Iran	2018	Hashemi-Shahri SH, Golshan A, Mohajeri SA, Baharara J, Amini E, Salek F, et al.	\	ROS-scavenging and Anti-tyrosinase Properties of Crocetin on B16F10 Murine Melanoma Cells
66	Kuwanon O，Sanggenon T	ingredient	Unknown	Morus australis Poir.	The fresh roots of M. australis Poir were collected from Sichuan Province, PR China in December 2010.	provided in previous study	provided in previous study	provided in previous study	tyrosinase activity，MITF	in vitro	B16 cells, human skin equivalents	China	2017	Hu S, Zheng Z, Chen F, Wang M.	\	The depigmenting effect of natural resorcinol type polyphenols Kuwanon O and Sanggenon T from the roots of morus australis
67	ginsenosides Rg5, ginsenosides Rk1，herbal extract	ingredient，crude extract	Unknown	Panax ginseng C.A.Mey.	The ginsenosides, Rg5 and Rk1, were products of Fleton Natural Products Co., Ltd (Chengdu, P.R. China).；Unknown	methanol	purchased	purchased；Dried P. ginseng Meyer was steamed at 95 °C for 3 h and dried at 50 °C for 30 h. This process was repeated nine times. The steamed and dried ginseng was extracted by grinding in 80% (v/v) methanol at 80 °C for 3 h. The methanol was subsequently eva_x0002_porated and the product was freeze-dried.	tyrosinase activity，MAPKs/MITF	in vivo	mushroom tyrosinase，B16F10 cells,Zebrafish, human volunteers	Korea	2018	Jin Y, Kim JH, Hong H-D, Kwon J, Lee EJ, Jang M, et al.	\	Ginsenosides Rg5 and Rkl, the skin-whitening agents in black ginseng
68	Kushenol A,8-prenylkaempferol	ingredient	Unknown	Sophora flavescens Aiton	Sophora flavescens roots were purchased from herbal medicine market in Jeongeup (Korea, April 2015) and identified by one of authors (J.H. Kim).	methanol	TM UFLC	S. flavescens roots (5 kg) were extracted with 95% methanol (36 L 2) at room temperature for a week. The methanol extract (770 g) condensed under reduced pressure was suspended in distilled water (1 L) and then progressively partitioned with chloro_x0002_form (27 g), ethyl acetate (100 g) and water (600 g) fractions. The ethyl acetate was subjected to a silica gel column chromatography with gradi…	tyrosinase activity，antioxidant	in vitro	mushroom tyrosinase，Human hepatoma HepG2 cells	Korea	2018	Kim JH, Cho IS, So YK, Kim H-H, Kim YH.	\	Kushenol A and 8-prenylkaempferol, tyrosinase inhibitors, derived from Sophora flavescens
69	3,6-anhydro-L-galactose (AHG),agarooligosaccharides (AOSs),neoagarooligosaccharides (NAOSs)	ingredient	Unknown	red macroalgae	Unknown	Unknown	LC/MS-IT-TOF	To generate AHG, NeoDP2, NeoDP4, and NeoDP6 from agarose, three enzymes involved in the β-agarase system of Saccharophagus degradans 2-40T, Aga16B (an endo-type β-agarase), Aga50D (an exo-type β-agarase), and SdNABH (an NABH), were used. AHG, NeoDP2, NeoDP4, and NeoDP6 were purified by affinity chromatography using a silica gel column (internal diameter (I.D.) 4 × 100 cm, 70–230 mesh ASTM; Merck,…	Unknown	in vitro	B16F10 cells, HEMs	Korea	2017	Kim JH, Yun EJ, Yu S, Kim KH, Kang NJ.	\	Different Levels of Skin Whitening Activity among 3,6-Anhydro-l-galactose, Agarooligosaccharides, and Neoagarooligosaccharides
70	Phytol	ingredient	Unknown	Unknown,algae,cyanobacteria	Sigma	purchased	purchased	purchased	tyrosinase activity，antioxidant，MAPKs/MITF	in vitro	B16F10 cells	Korea	2018	Ko G-A, Cho SK	\	Phytol suppresses melanogenesis through proteasomal degradation of MITF via the ROS-ERK signaling pathway
71	wogonin，Wogonoside，oroxylin A，Norwogonin	ingredient	Unknown	Scutellaria baicalensis Georgi	Wako Pure Chemical (Osaka, Japan)，Faces Biochemical (Daejeon, Korea)，Extrasynthese (Lyon, France)	purchased	HPLC	purchased	other	in vitro	B16F10 cells, HEMs	Japan	2017	Kudo M, Kobayashi-Nakamura K, Tsuji-Naito K	\	Bifunctional effects of O-methylated flavones from Scutellaria baicalensis Georgi on melanocytes: Inhibition of melanin production and intracellular melanosome transport
72	Galacturonic acid	ingredient	Unknown	pectin	purchased	purchased	purchased	purchased	tyrosinase activity，MITF	in vitro	B16 cells, human skin equivalents	Korea	2018	Lee CS, Baek HS, Bae IH, Choi SJ, Kim YJ, Lee JH, et al.	\	Depigmentation efficacy of galacturonic acid through tyrosinase regulation in B16 murine melanoma cells and a three-dimensional human skin equivalent
73	ginsenoside F1	ingredient	Unknown	Panax ginseng C.A.Mey.	purchased	purchased	purchased	purchased	other	in vitro	MNT-1/HaCaT cells,HEMs,3D human skin equivalent	Korea	2019	Lee C-S, Nam G, Bae I-H, Park J.	\	Whitening efficacy of ginsenoside F1 through inhibition of melanin transfer in cocultured human melanocytes-keratinocytes and three-dimensional human skin equivalent
74	Ginsenoside Rh23	ingredient	Unknown	Panax ginseng C.A.Mey.	Hydroponic Panax ginseng was grown in the greenhouse of the Department of Herbal Crop Research located in Eumseong, Chungbuk Province according to the protocol of “ginseng GAP standard cultivation guide” developed by the Rural Development Administration, Republic of Korea; One-year-old ginseng seedling roots weighing 0.8 to 1 g were purchased from Department of Herbal Crop Research, National Inst…	methanol	UPLC-QTOF/MS	The dried and powdered leaves of hydroponic P. ginseng (HPGL, 6 kg) were extracted with 80% MeOH (30 L × 3) at room temperature for 24 h. The extracts were filtered through filter paper and evaporated under reduced pressure at 45 ◦C to yield 1.4 kg of extract. The extract was poured into H2O (3L) and extracted with EtOAc (3 L × 3) and n-BuOH (2.6 L × 3), successively. Each layer was concentrated …	tyrosinase activity	in vivo	Melan-a,Zebrafish	Korea	2018	Lee DY, Kim H-G, Lee Y-G, Kim JH, Lee JW, Choi B-R, et al.	\	Isolation and Quantification of Ginsenoside Rh23, a New Anti-Melanogenic Compound from the Leaves of Panax ginseng
75	gomisin N	ingredient	Unknown	Schisandra chinensis (Turcz.) Baill.	Dried fruits of S. chinensis were purchased in September 2014 at Munkyoung market, Korea	ethanol	MPLC	S. chinensis fruits (1.0 kg) were extracted with 95% EtOH (7.0 l) at room temperature for 3 days. The ethanolic extract was concentrated under a vacuum evaporator to yield a red-yellow residue (approximately 303 g), which 808 J. Lee et al. 123was suspended in 20% EtOH (3.0 l) and partitioned with n_x0002_hexane, CH2Cl2, EtOAc, BuOH, and water successively. The n-hexane fraction (60.6 g) was subje…	AKT/MITF	in vitro	B16F10 cells	Korea	2017	Lee J, Ryu HS, Kim J-M, Jung T-H, Park S-M, Lee Y-M.	\	Anti-melanogenic effect of gomisin N from Schisandra chinensis (Turcz.) Baillon (Schisandraceae) in melanoma cells
76	β-mangostin	ingredient	Unknown	Garcinia × mangostana L.	Seedcases of G. mangostana, collected in Vietnam, were provided by LanSea Food Co., Ltd. (www.lansea.co.kr, Seoul, Korea) in August, 2009.	chloroform	Unknown	The dried seedcases of G. mangostana (0.5 kg) were powdered and extracted with chloroform at room temperature. The extract was concentrated on a rotatory evaporator and kept in a desiccator for complete removal of the solvent to give a dark red residue (65.5 g). A portion of this residue (5 g) was subjected to silica gel (5 × 50 cm, 230–400 mesh, 500 g) column chromatography with a stepwise gradi…	MITF,autophagy	in vitro	B16F10 cells	Korea	2017	Lee KW, Ryu HW, Oh S-s, Park S, Madhi H, Yoo J, et al.	\	Depigmentation of alpha-melanocyte-stimulating hormone-treated melanoma cells by beta-mangostin is mediated by selective autophagy
77	dehydroglyasperin C	ingredient	Unknown	Glycyrrhiza uralensis Fisch.	Sigma	purchased	purchased	purchased	tyrosinase activity,cAMP/CREB/MAPKs/MITF	in vitro	B16F1 cells	Korea	2018	Lim JW, Ha JH, Jeong YJ, Park SN.	\	Anti-melanogenesis effect of dehydroglyasperin C through the downregulation of MITF via the reduction of intracellular cAMP and acceleration of ERK activation in B16F1 melanoma cells
78	soliquiritigenin	ingredient	Unknown	Glycyrrhiza uralensis Fisch.	Aladdin (Shanghai, China)	purchased	purchased	purchased	tyrosinase activity，MAPKs/MITF	in vitro	mushroom tyrosinase,HaCaT,SK-MEL-2 cells,HEMs,Human skin	China	2020	Lv J, Fu Y, Cao Y, Jiang S, Yang Y, Song G, et al.	\	Isoliquiritigenin inhibits melanogenesis, melanocyte dendricity and melanosome transport by regulating ERK-mediated MITF degradation
79	yuganin A	ingredient	Unknown	Prangos pabularia Lindl.	The roots of P. pabularia were collected from Takob valley of the Republic of Tajikistan in August 2016. The roots were authenticated by Dr Sodik Numonov	ethanol	HPLC	An extraction procedure of powdered roots of P. pabularia (300 g) was performed using 95% aqueous ethanol at room temperature for 24 h (three times). The 95% aqueous ethanol extract was concentrated under reduced pressure at 45 °C to yield a residue (70 g). A part of extract (40 g) was suspended in water and successively partitioned in hexane and chlo_x0002_roform to aﬀord the hexane fraction (3 …	Unknown	in vitro	B16 cells	Coperative:China,Tajikistan	2018	Numonov S, Bobakulov K, Numonova M, Sharopov F, Setzer WN, Khalilov Q, et al.	\	New coumarin from the roots of Prangos pabularia
80	Zerumbone，herbal extract	ingredient，crude extract	Unknown	Zingiber officinale Roscoe	Sigma	purchased	purchased	purchased	tyrosinase activity，MAPKs/MITF	in vitro	G361,B16F10 cells	Korea	2018	Oh T-I, Jung H-J, Lee Y-M, Lee S, Kim G-H, Kan S-Y, et al.	\	Zerumbone, a Tropical Ginger Sesquiterpene of Zingiber officinale Roscoe, Attenuates -MSH-Induced Melanogenesis in B16F10 Cells
81	Plumbagin	ingredient	Unknown	Plumbago genus	Sigma	purchased	purchased	purchased	tyrosinase activity，antioxidant，MITF	in vitro	mushroom tyrosinase，B16F10 cells,HaCaT cells,lens epithelial cells	Korea	2017	Oh T-I, Yun J-M, Park E-J, Kim Y-S, Lee Y-M, Lim J-H.	\	Plumbagin Suppresses -MSH-Induced Melanogenesis in B16F10 Mouse Melanoma Cells by Inhibiting Tyrosinase Activity
82	Sulfated galactans	ingredient	0.9	Gracilaria fisheri	The red alga Gracilaria fisheri was collected from the southern coast of Thailand	SG was extracted and purified as previously described (Wongprasert et al. 2014).	HPLC	SG was extracted and purified as previously described (Wongprasert et al. 2014).	tyrosinase activity，MITF	in vitro	B16F10 cells	Thailand	2018	Pratoomthai B, Songtavisin T, Gangnonngiw W, Wongprasert K.	\	In vitro inhibitory effect of sulfated galactans isolated from red alga Gracilaria fisheri on melanogenesis in B16F10 melanoma cells
83	lignin	ingredient	Unknown	Saccharum officinarum L.	Sugarcane bagasse was obtained from Kaset Thai International Sugar Corporation Public Co., Ltd. (Nakhon Sawan, Thailand)	NaOH	FT-IR	Alkaline hydrolysis of sugarcane bagasse was performed in an autoclave. Sugarcane bagasse (0.5 g) was mixed with sodium hydroxide solutions at different concentrations (3–7 %w/v) with a solid to liquid ratio of 1:50 w/v in a 50-ml conical tube. Thereafter, the mixtures were autoclaved at various temperatures (110–130 °C) and times (30–60 min)	Sun protection,tyrosinase activity	in vitro	mushroom tyrosinase	Thailand	2020	Ratanasumarn N, Chitprasert P.	\	Cosmetic potential of lignin extracts from alkaline-treated sugarcane bagasse: Optimization of extraction conditions using response surface methodology
84	Phenylethyl alcohol，total phenolics, flavonoids, total solid and volatile contents	ingredient，crude extract	Unknown	Rosa rugosa Thunb.	Phenylethyl alcohol, α-bisabolol, α-terpineol, citronellol, miconazole nitrate, hydrochloride tetracycline, men_x0002_thol and camphor were purchased from J&K Scientific Ltd. (Beijing).	purchased	purchased；HPLC, GC/MS	purchased	tyrosinase activity	in vitro	mushroom tyrosinase	China	2018	Ren G, Xue P, Sun X, Zhao G.	\	Determination of the volatile and polyphenol constituents and the antimicrobial, antioxidant, and tyrosinase inhibitory activities of the bioactive compounds from the by-product of Rosa rugosa Thunb. var. plena Regal tea
85	tetrahydrocurcumin	ingredient	0.95	Curcuma longa L.	Tetrahydrocurcumin (THC) with 95% purity was pur_x0002_chased from Novel Nutrients Pvt. Ltd., India.	purchased	purchased	purchased	Unknown	in vitro	HFF-1,B16F10 cells	India	2017	Trivedi MK, Gangwar M, Mondal SC, Jana S.	\	Protective effects of tetrahydrocurcumin (THC) on fibroblast and melanoma cell lines in vitro: it's implication for wound healing
86	Urolithin A, Urolithin B	ingredient	Unknown	ellagic acid derivatives	Unknown	Unknown	Unknown	Unknown	tyrosinase activity	in vitro	B16F10 cells	China	2017	Wang S-T, Chang W-C, Hsu C, Su N-W	\	Antimelanogenic Effect of Urolithin A and Urolithin B, the Colonic Metabolites of Ellagic Acid, in B16 Melanoma Cells
87	red seaweed polysaccharides and their degradation products	crude extract	Unknown	Porphyra haitanensis,Gracilaria chouae, Gracilaria blodgettii	The red algae were purchased from a local market in Shantou.	methanol/dichloromethane/water (4:2:1; v/v/v)	GC-MS	Red algal powder was smashed (100 g) and then soaked with shaking for 24 h in methanol/dichloromethane/water (4:2:1; v/v/v) solution in a ratio of 10:1 (v/w, mL/g) to remove interfering compounds. The residue was collected by centrifuging at 4000×g for 10 min and then dried in an oven at 50 °C.	tyrosinase activity	in vitro	mushroom tyrosinase	China	2020	Xie X-T, Zhang X, Liu Y, Chen X-Q, Cheong K-L.	\	Quantification of 3,6-anhydro-galactose in red seaweed polysaccharides and their potential skin-whitening activity
88	Soyasaponin Ag	ingredient	>95%	Glycine max (L.) Merr.,Lens culinaris Medik.,Pisum sativum L.	Unknown	80% (v/v) aqueous methanol	HPLC,LC-PDA-MS/MS	Soybean saponins Ag were purifed by the method previously described in the study by Shiraiwaetal(15) with some modifcations. The seed hypocotyls were extracted in a 10-fold volume (v/v) of 80% (v/v) aqueous methanol for 24 h at room temperature. The extracts were concentrated in vacuo to evaporate the solvents. The dried extracts were suspended in a mixture of 2‑butanol, water and acetic acid (fn…	tyrosinase activity,MITF	in vitro	B16F10 cells	Coperative:Korea,Russia	2017	Yang SH, Tsatsakis AM, Tzanakakis G, Kim H-S, Le B, Sifaki M, et al.	\	Soyasaponin Ag inhibits alpha-MSH-induced melanogenesis in B16F10 melanoma cells via the downregulation of TRP-2
89	alisol B	ingredient	Unknown	Alisma orientale (Sam.) Juz.	Unknown	Unknown	Unknown	Unknown	CREB/MAPKs/MITF	in vitro	B16 cells	Japan	2017	Yoshida I, Ito C, Matsuda S, Tsuji A, Yanaka N, Yuasa K.	\	Alisol B, a triterpene from Alismatis rhizoma (dried rhizome of Alisma orientale), inhibits melanin production in murine B16 melanoma cells
90	Ginkgolide B	ingredient	0.99	Ginkgo biloba L.	The GB (99% HPLC grade) were bought from the National Institute for Food and Drug Control (Beijing, China).	purchased	HPLC	purchased	tyrosinase activity，antioxidant，MITF	in vitro	B16f1 cells	China	2019	Zhao Z, Ma S, Dong X.	\	Anti-melanogenesis Efficacy of Ginkgolide B is Favored by Attenuating Oxidative Stress and Melanin Synthesis in B16f1 Melanoma Cell Model
